# Supplementary material
Source: publisher figshare collection journal article supplement (https://acs.figshare.com/ndownloader/files/3801019)
Supplement: Supplementary file 1 [file 3801019]

Supporting Information (SI) for

# **Facile Approach to Synthesize Au@ZnO Core-Shell Nanoparticles and Their Application for Highly Sensitive and Selective Gas Sensors**

Sanjit Manohar Majhi,<sup>†</sup>Prabhakar Rai,<sup>‡</sup> and Yeon-Tae Yu<sup>\*,†</sup>

<sup>†</sup>Division of Advanced Materials Engineering and Research Centre for Advanced Materials Development, College of Engineering, Chonbuk National University, Jeonju 561-756, South Korea

<sup>‡</sup>Department of Chemical Engineering, Indian Institute of Technology Kanpur, Kanpur 208016, India

<sup>\*</sup>E-mail: yeontae@jbnu.ac.kr, Phone: +82-63-270-2288, Fax: +82-63-270-2305

### *Synthesis of Au NPs:*

The Au NPs were synthesized by using a simple solution process reported in our previous paper.<sup>1</sup>In brief,  $\text{HAuCl}_4$  solution (250mL, 1mM) was heated with a mild stirring until the boiling point (100 °C) was reached. A solution of trisodium citrate (25mL, 34mM) was then added to the solution with rapid stirring. The mixed solution was kept at 97<sup>0</sup>C for 15min with constant stirring. After that, the resulting Au colloid was finally allowed to cool down to room temperature and used further without any centrifugation. The size of the prepared Au NPs are found about 10-15nm.

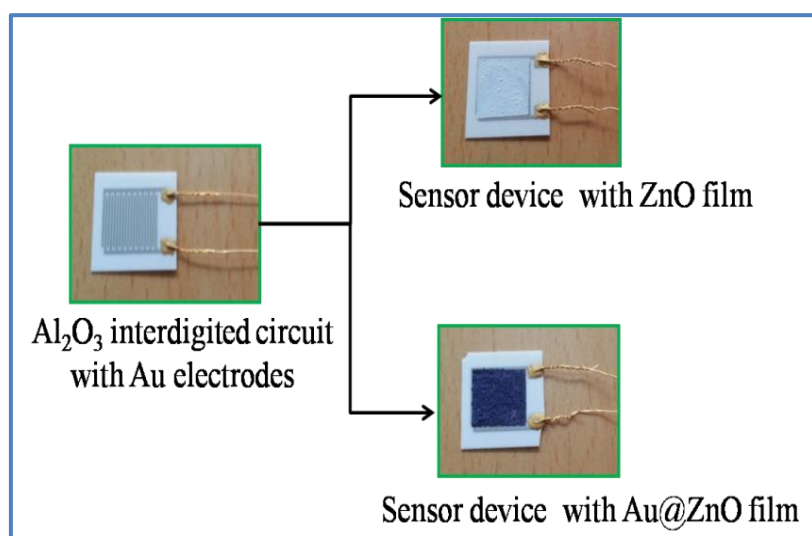

**Fig.S1** Photographs of sensor devices made from pure ZnO NPs and Au@ZnO CSNPs.

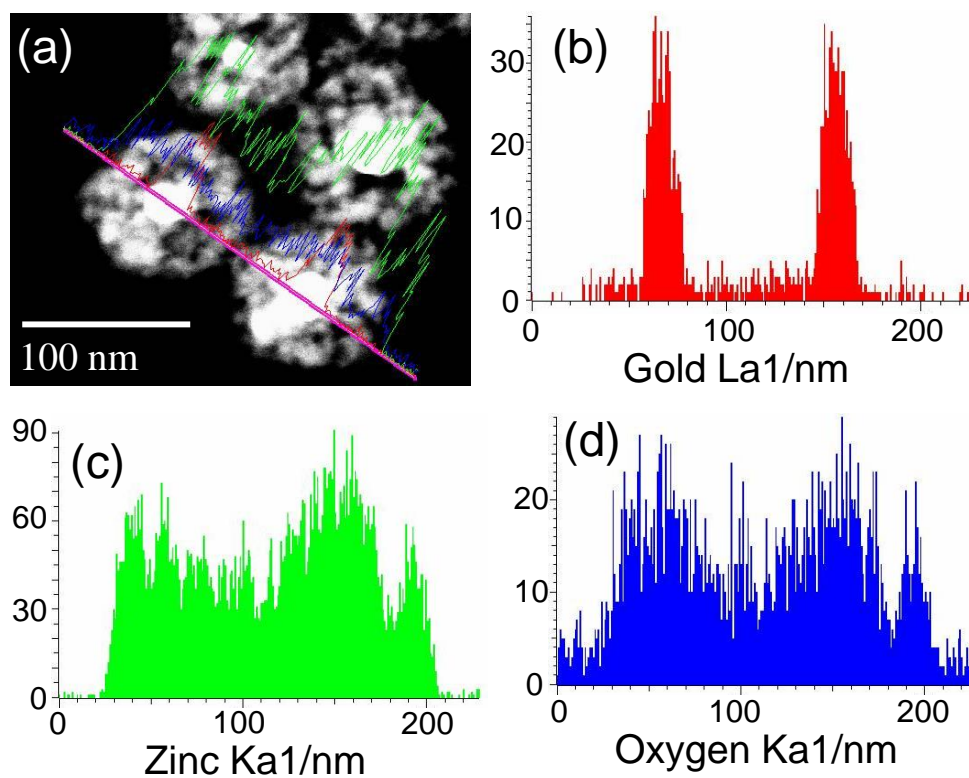

**Figure S2.** (a) HAADF-STEM line scan images of Au@ZnO CSNPs showing the intensities of (b) Au, (c) Zn and (d) O elements.

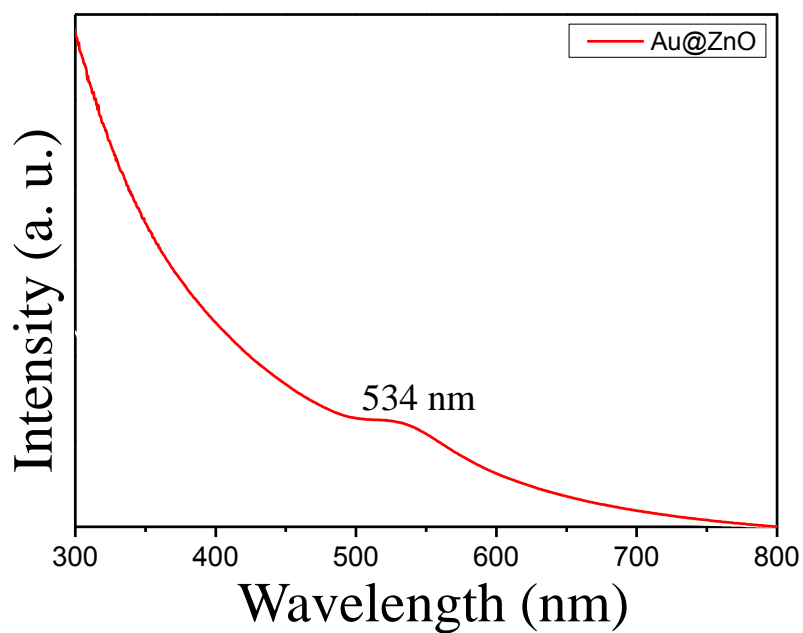

**Figure S3.** UV-visible spectrum of as synthesized Au@ZnO CSNPs.

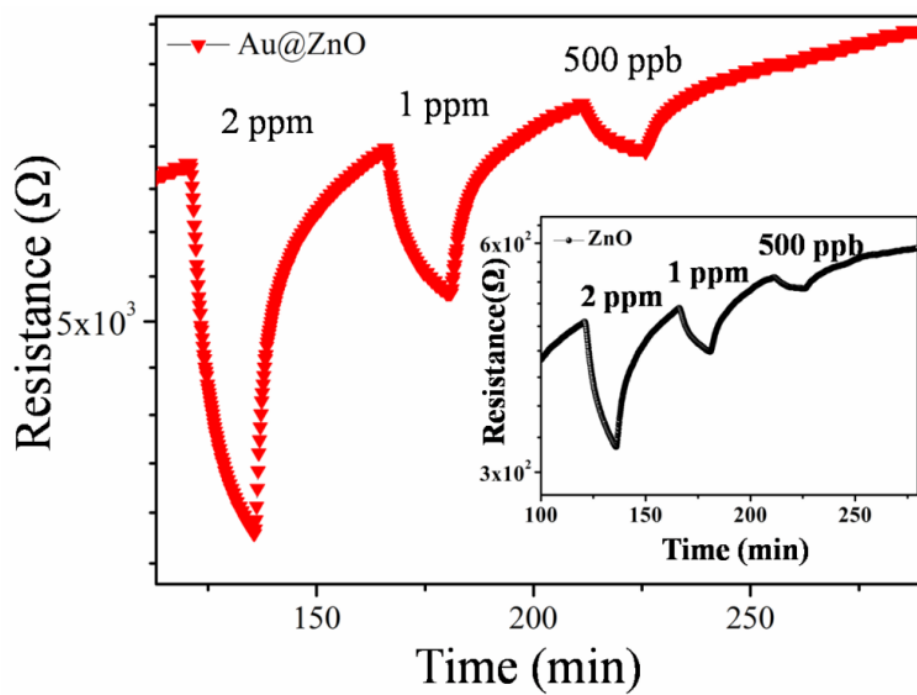

**Figure S4.** Dynamic  $H_2$  sensing transients of pure ZnO NPs and Au@ZnO CSNPs (500 ppb - 2 ppm) at  $300^\circ\text{C}$ .

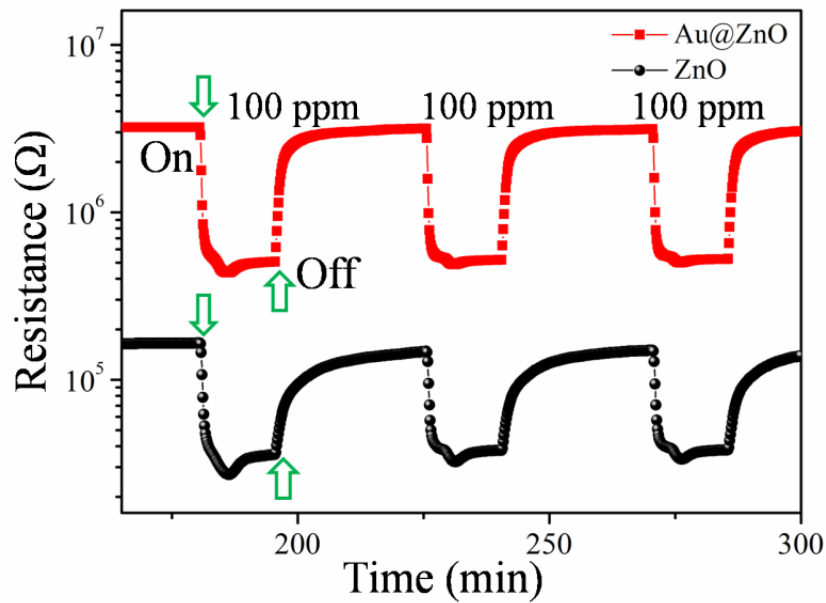

**Figure S5.** Response reproducibility test of the ZnO NPs and Au@ZnO CSNPs sensors at 400°C.

REFERENCE:

- (1) Yu, Y-T.; Dutta, P. Examination of Au/SnO<sub>2</sub>Core-Shell Architecture Nanoparticle for Low Temperature Gas Sensing Applications. *Sens. Actuators, B* **2011**, *157*, 444–449.
